# Supplementary figures and images for: Efficient and stable blue perovskite light-emitting diodes enabled by the synergistic incorporation of dual additives
Source: Royal Society of Chemistry journal article supplement (doi:10.1039/d4nr05355a), 2025-01-01

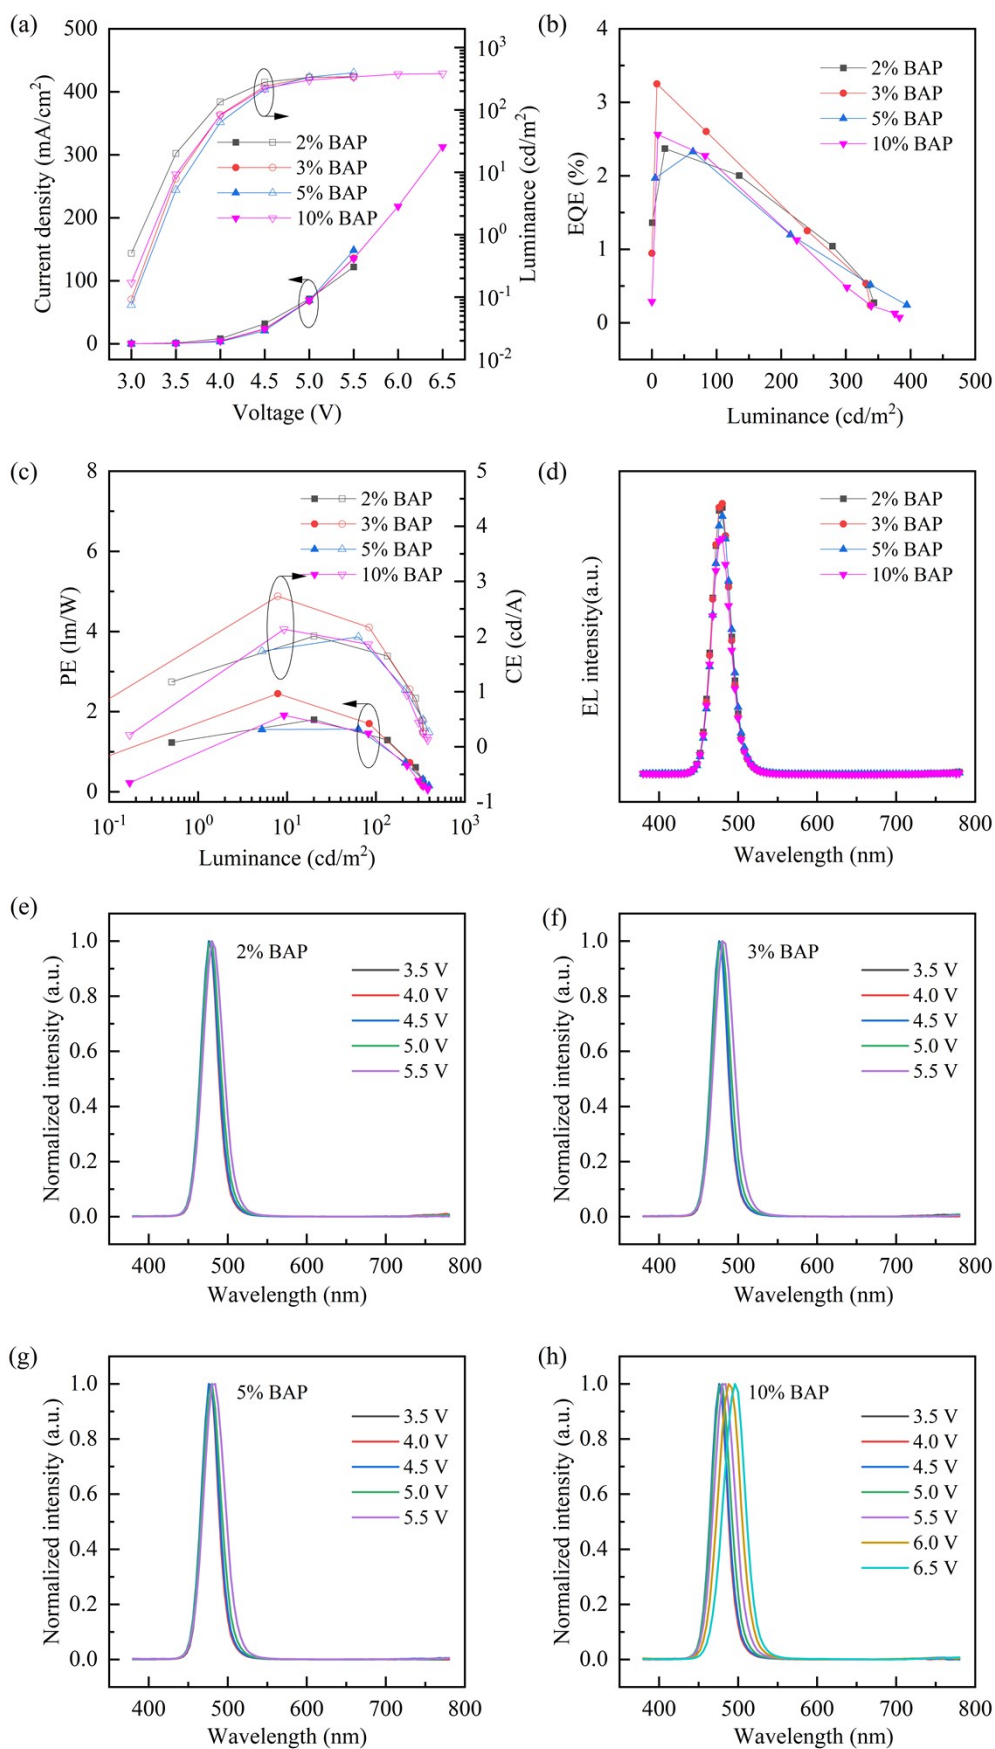

Supplement: d4nr05355a2.pdf [file d4nr05355a2.pdf]
